# Supplementary material for: Synergistic Effect of β-Lapachone and Aminooxyacetic Acid on Central Metabolism in Breast Cancer
Source: MDPI journal article supplement (doi:10.3390/nu14153020), 2022-07-22
Supplement: s1 [file s1]

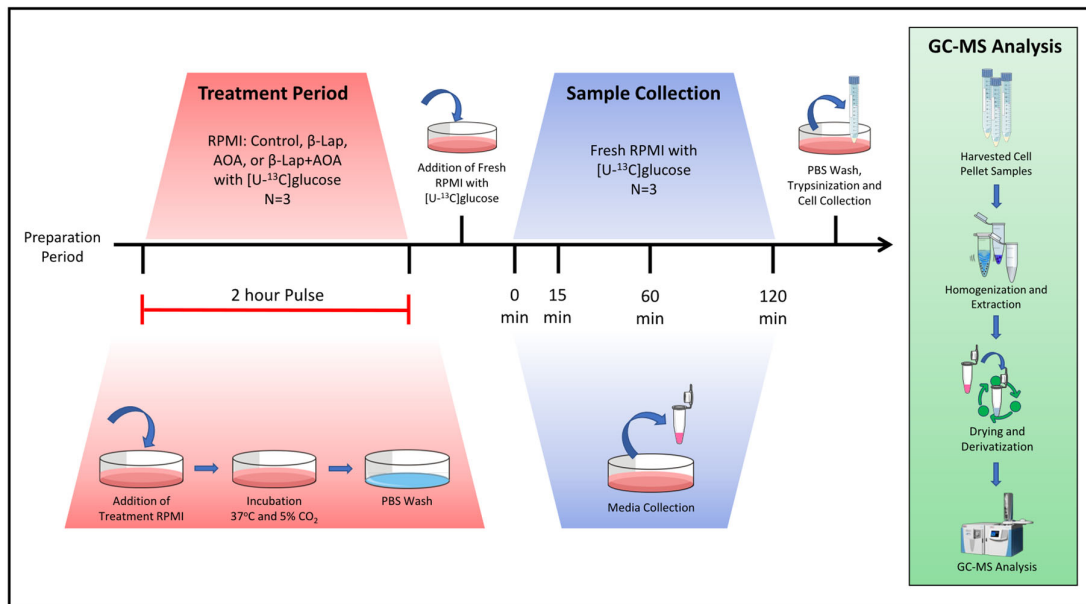

**Figure S1.** Schematic representation of the experiment timeline. Prior to initiating the experiment, all reagents and media were prepared during the preparation period. The experiment began upon the addition of treatment RPMI (Control,  $\beta$ -lap, AOA, or  $\beta$ -lap+AOA) containing  $[U-^{13}C]$ glucose tracer. Cells were incubated in treatment media for 2 h and then immediately washed with PBS and incubated with fresh RPMI with  $[U-^{13}C]$ glucose for an additional 2 h. During the final 2 h incubation, media sample points were collected. At the end of the experiment, cells were washed with PBS, harvested by trypsinization, and processed for GC-MS analysis. Sample preparation for GC-MS analysis involved homogenizing and extracting cell pellets, drying media samples and cell extracts, derivatizing all dried samples, and loading samples into GC vials. RPMI, Roswell Park Memorial Institute Medium;  $\beta$ -lap,  $\beta$ -lapachone; AOA, aminooxyacetic acid; PBS, phosphate buffered saline; GC-MS, gas chromatography–mass spectrometry.

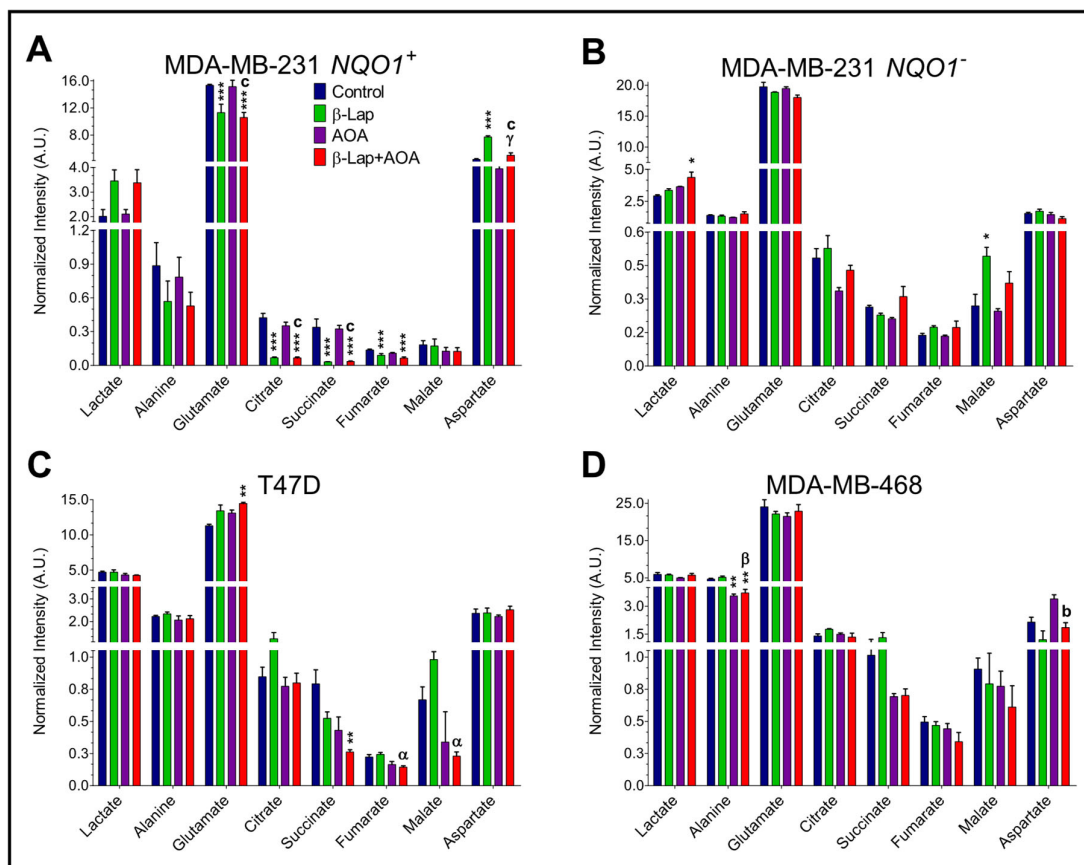

**Figure S2.** Normalized intensity of intracellular metabolite pools in MDA-MB-231 *NQO1*<sup>+</sup> (A), MDA-MB-231 *NQO1*<sup>-</sup> (B), T47D (C), and MDA-MB-468 (D) breast cancer cells. (Note:  $n = 3$ , biological replicate data is represented as mean  $\pm$  SEM. Statistical significance was determined by ANOVA and student's t-test post hoc analysis and is presented as: (\*) if  $p \leq 0.05$ , (\*\*) if  $p \leq 0.01$ , and (\*\*\*) if  $p \leq 0.001$  compared to control. ( $\alpha$ ) if  $p \leq 0.05$ , ( $\beta$ ) if  $p \leq 0.01$ , and ( $\gamma$ ) if  $p \leq 0.001$  compared to  $\beta$ -lap treatment. (b) if  $p \leq 0.01$  and (c) if  $p \leq 0.001$  compared to AOA treatment.). *NQO1*, quinone oxidoreductase 1; SEM, standard error of the mean; A.U., arbitrary units.

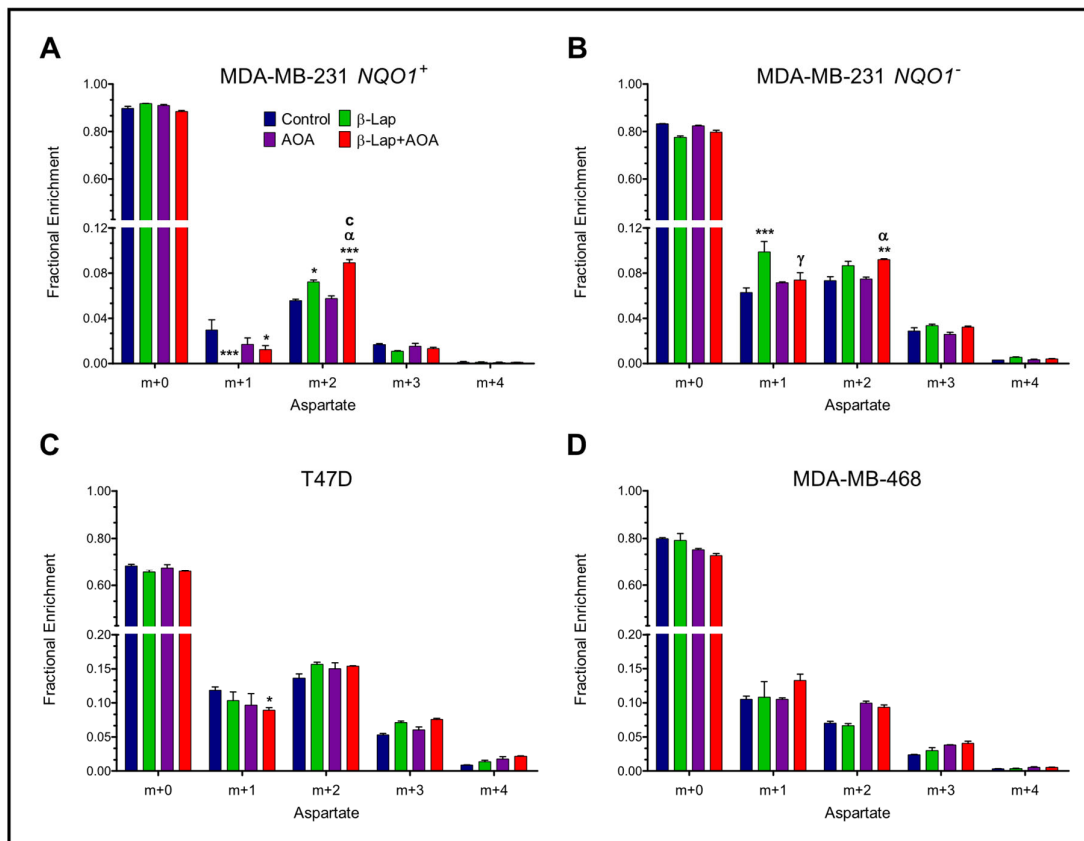

**Figure S3.** Intracellular aspartate isotopologue distribution in MDA-MB-231 *NQO1*<sup>+</sup> (A), MDA-MB-231 *NQO1*<sup>-</sup> (B), T47D (C), and MDA-MB-468 (D) breast cancer cells. (Note:  $n = 3$ , biological replicate data is represented as mean  $\pm$  SEM. Statistical significance was determined by ANOVA and student's t-test post hoc analysis and is presented as: (\*) if  $p \leq 0.05$ , (\*\*) if  $p \leq 0.01$ , and (\*\*\*) if  $p \leq 0.001$  compared to control. ( $\alpha$ ) if  $p \leq 0.05$  and ( $\gamma$ ) if  $p \leq 0.001$  compared to  $\beta$ -lap treatment. (c) if  $p \leq 0.001$  compared to AOA treatment.).

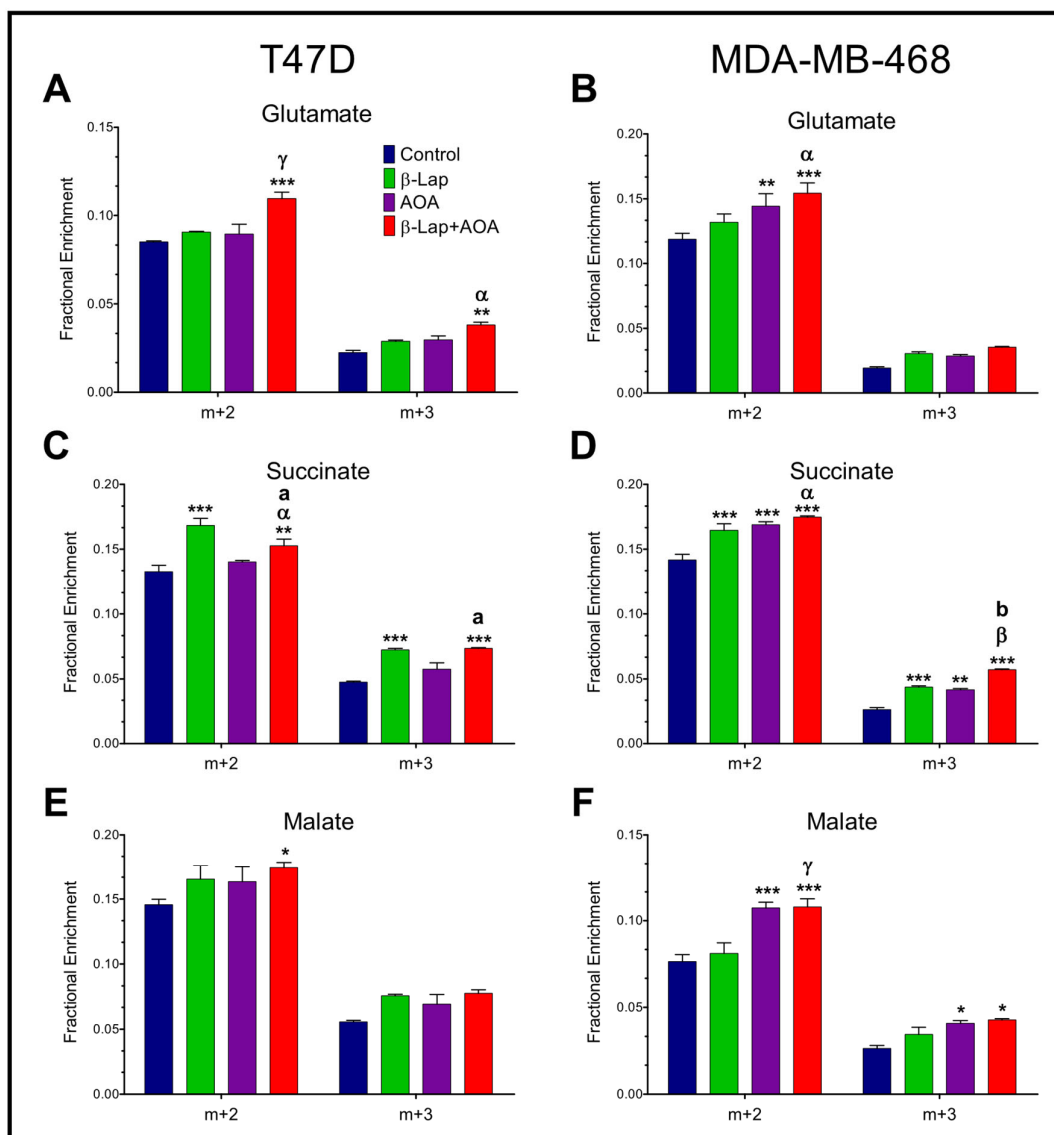

**Figure S4.** Analysis of TCA cycle metabolite enrichments in T47D (A,C,E) and MDA-MB-468 (B,D,F) breast cancer cells. (Note:  $n = 3$ , biological replicate data is represented as mean  $\pm$  SEM. Statistical significance was determined by ANOVA and student's t-test post hoc analysis and is presented as: (\*) if  $p \leq 0.05$ , (\*\*) if  $p \leq 0.01$ , and (\*\*\*) if  $p \leq 0.001$  compared to control. ( $\alpha$ ) if  $p \leq 0.05$ , ( $\beta$ ) if  $p \leq 0.01$ , and ( $\gamma$ ) if  $p \leq 0.001$  compared to  $\beta$ -lap treatment. (a) if  $p \leq 0.05$  and (b) if  $p \leq 0.01$  compared to AOA treatment). TCA, tricarboxylic acid.

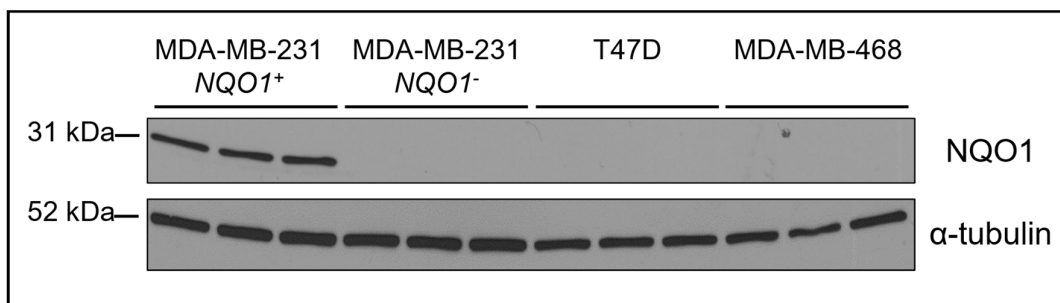

**Figure S5.** NQO1 protein expression levels of MDA-MB-231 *NQO1*<sup>+</sup>, MDA-MB-231 *NQO1*<sup>-</sup>, T47D, and MDA-MB-468 breast cancer cells. Western blot was performed on  $n = 3$  biological replicates.

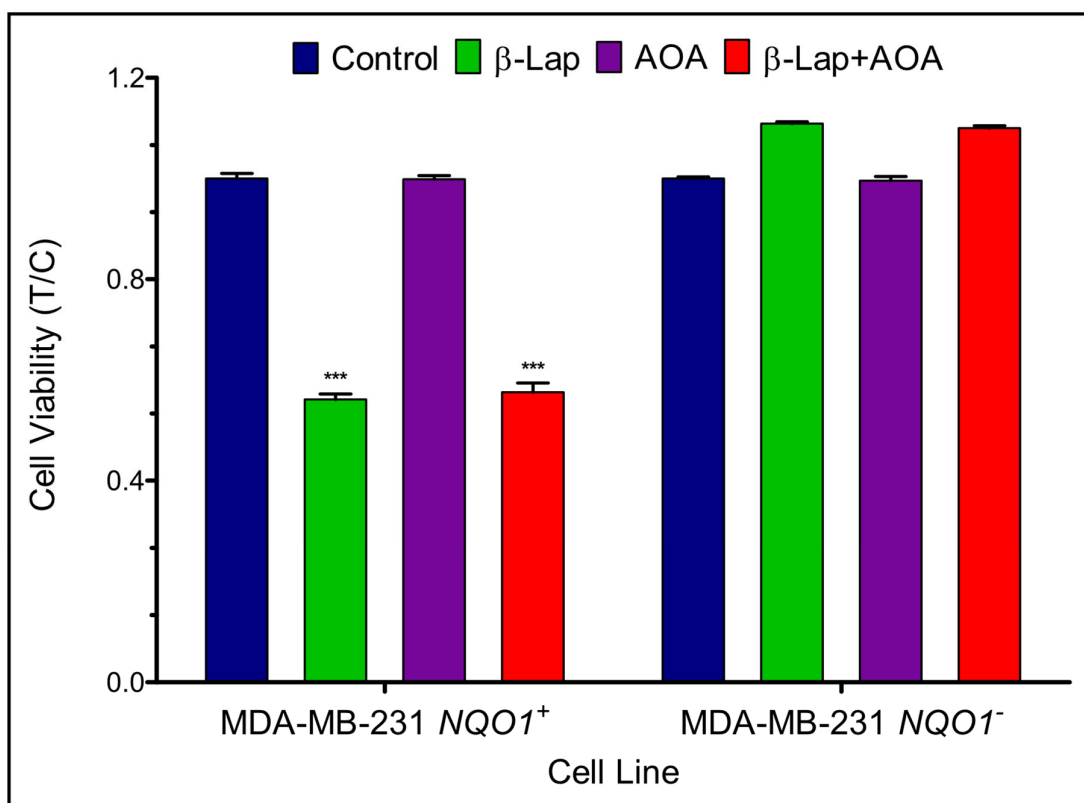

**Figure S6.** Cell viability analysis in MDA-MB-231 NQO1<sup>+</sup> and NQO1<sup>-</sup> triple negative breast cancer cells. An MTT assay was performed on  $n = 3$  biological replicates. Significantly lower viability was observed in NQO1<sup>+</sup> cells treated with β-lap and combinatorial treatments, while no significance was observed in NQO1<sup>-</sup> cells across treatments. Statistical significance was determined by student's t-test analysis and is presented as: (\*\*\*) if  $p \leq 0.001$  compared to control. MTT, 3-[4,5-dimethylthiazol-2-yl]-2,5 diphenyl tetrazolium bromide.

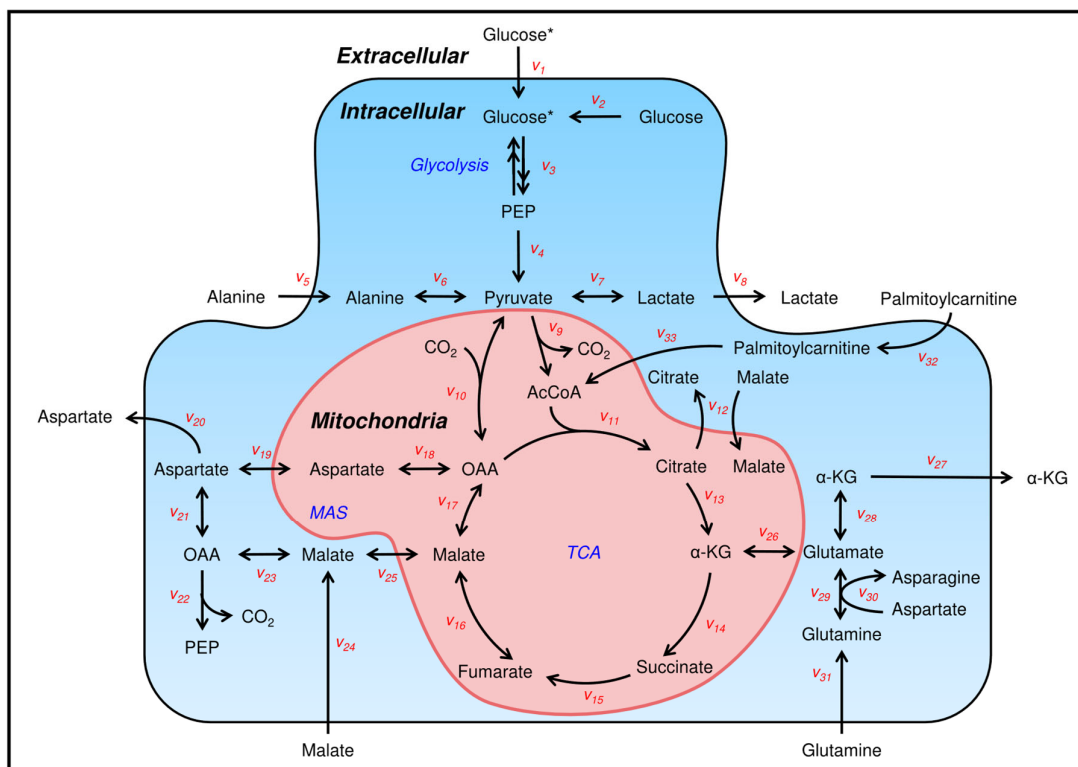

**Figure S7.** Representative diagram of the flux model analysis. The glu-ox model suppresses the  $v_{32}$  and  $v_{33}$  flux from palmitate, while mult-ox allows for sources of acetyl-CoA from other substrates in the media. Metabolites are represented in black text and flux reactions are in red. Labeled glucose is denoted by a (\*). Specific flux reactions are further detailed in Supplementary Materials Table S2. CoA, coenzyme A; PEP, phosphoenolpyruvate; AcCoA, acetyl-coenzyme A; OAA, oxaloacetic acid;  $\alpha$ -KG, alpha ketoglutarate, MAS, malate-aspartate shuttle.

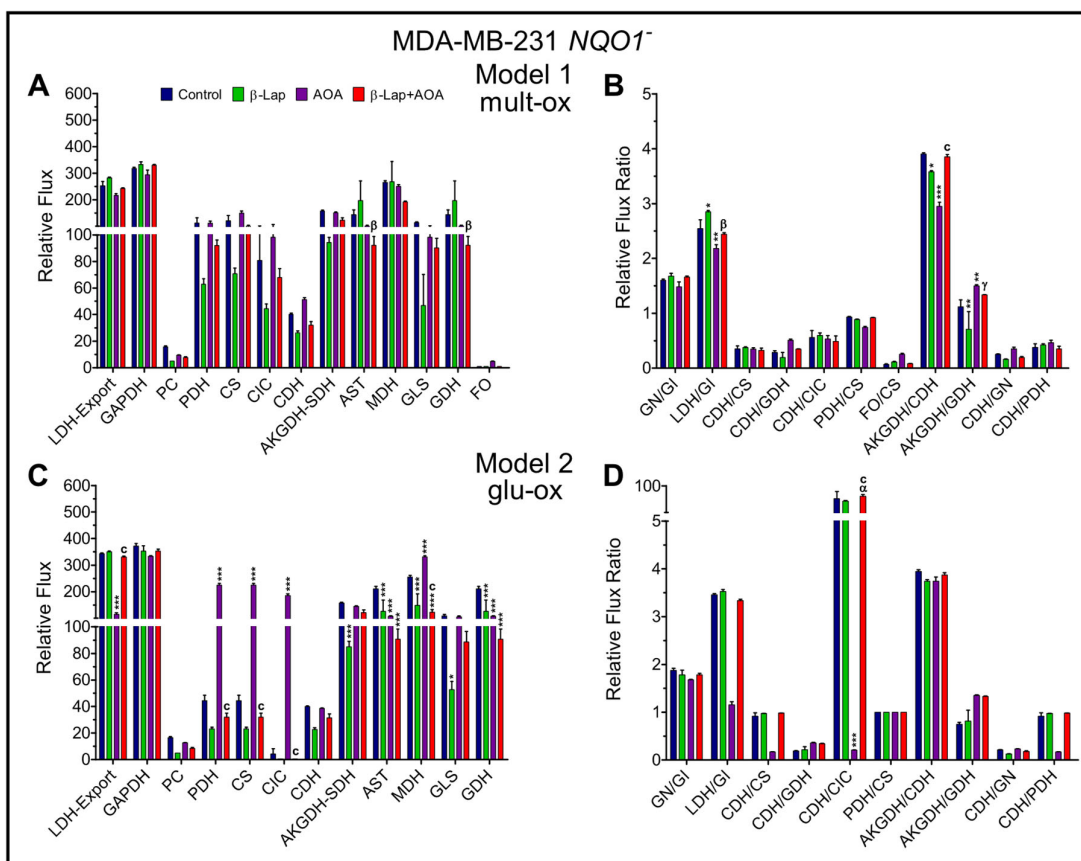

**Figure S8.** Flux model analysis in MDA-MB-231 *NQO1*<sup>-</sup>. Model 1 is represented in relative fluxes and relative flux ratios in panels (A,B), and Model 2 is represented in panels (C,D). Abbreviation of metabolic reactions: lactate dehydrogenase (LDH), lactate export (Export), glyceraldehyde-3-phosphate dehydrogenase (GAPDH), pyruvate carboxylase (PC), pyruvate dehydrogenase (PDH), citrate synthase (CS), mitochondrial citrate carrier (CIC), citrate dehydrogenase (CDH),  $\alpha$ -ketoglutarate dehydrogenase (AKGDH), succinate dehydrogenase (SDH), aspartate aminotransferase (AST), malate dehydrogenase (MDH), glutaminase (GLS), glutamate dehydrogenase (GDH), and fatty acid oxidation (FO). (Note:  $n = 3$ , biological replicate data is represented as mean  $\pm$  SEM. Statistical significance was determined by ANOVA and student's t-test post hoc analysis and is presented as: (\*) if  $p \leq 0.05$ , (\*\*) if  $p \leq 0.01$ , and (\*\*\*) if  $p \leq 0.001$  compared to control. ( $\alpha$ ) if  $p \leq 0.05$ , ( $\beta$ ) if  $p \leq 0.01$ , and ( $\gamma$ ) if  $p \leq 0.001$  compared to  $\beta$ -lap treatment. (c) if  $p \leq 0.001$  compared to AOA treatment.).



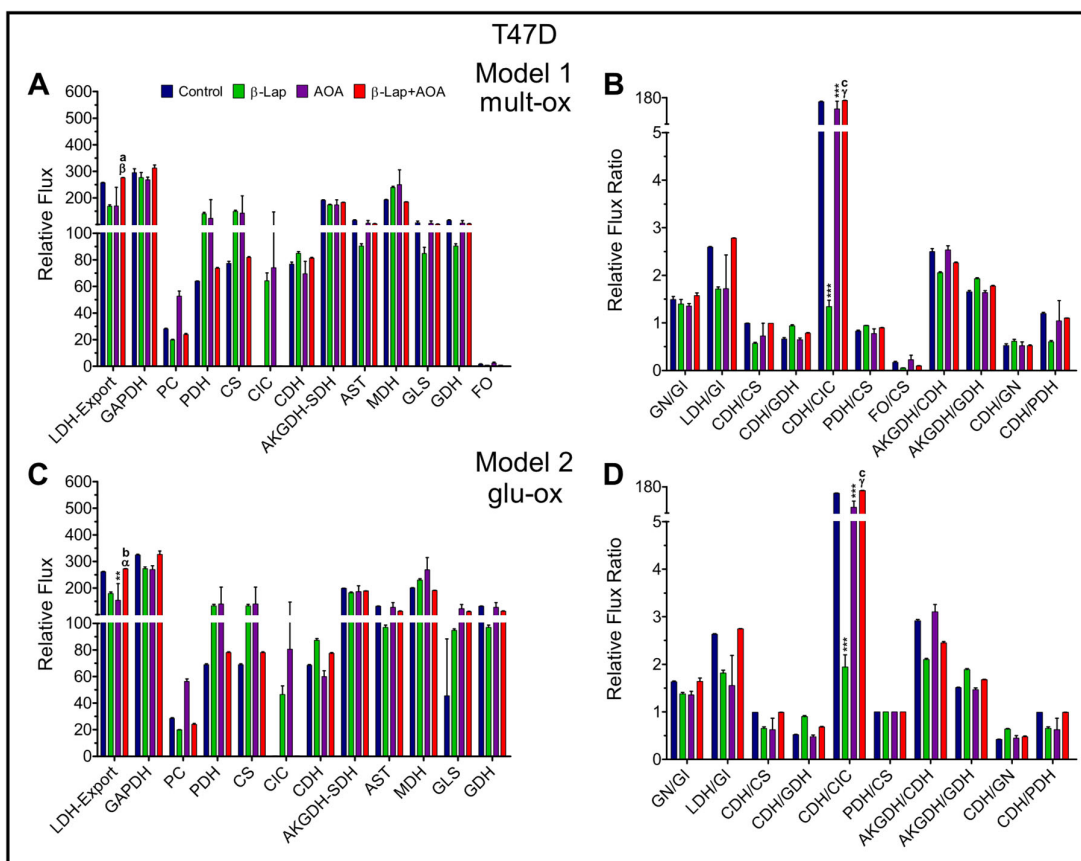

**Figure S9.** Flux model analysis in T47D. Model 1 is represented in relative fluxes and relative flux ratios in panels (A,B), and Model 2 is represented in panels (C,D). Abbreviation of metabolic reactions: lactate dehydrogenase (LDH), lactate export (Export), glyceraldehyde-3-phosphate dehydrogenase (GAPDH), pyruvate carboxylase (PC), pyruvate dehydrogenase (PDH), citrate synthase (CS), mitochondrial citrate carrier (CIC), citrate dehydrogenase (CDH),  $\alpha$ -ketoglutarate dehydrogenase (AKGDH), succinate dehydrogenase (SDH), aspartate aminotransferase (AST), malate dehydrogenase (MDH), glutaminase (GLS), glutamate dehydrogenase (GDH), and fatty acid oxidation (FO). (Note:  $n = 3$ , biological replicate data is represented as mean  $\pm$  SEM. Statistical significance was determined by ANOVA and student's t-test post hoc analysis and is presented as: (\*\*\*) if  $p \leq 0.001$  and (\*\*) if  $p \leq 0.01$  compared to control. (a) if  $p \leq 0.05$ , (b) if  $p \leq 0.01$ , and (c) if  $p \leq 0.001$  compared to  $\beta$ -lap treatment. (a) if  $p \leq 0.05$ , (b) if  $p \leq 0.01$ , and (c) if  $p \leq 0.001$  compared to AOA treatment.).

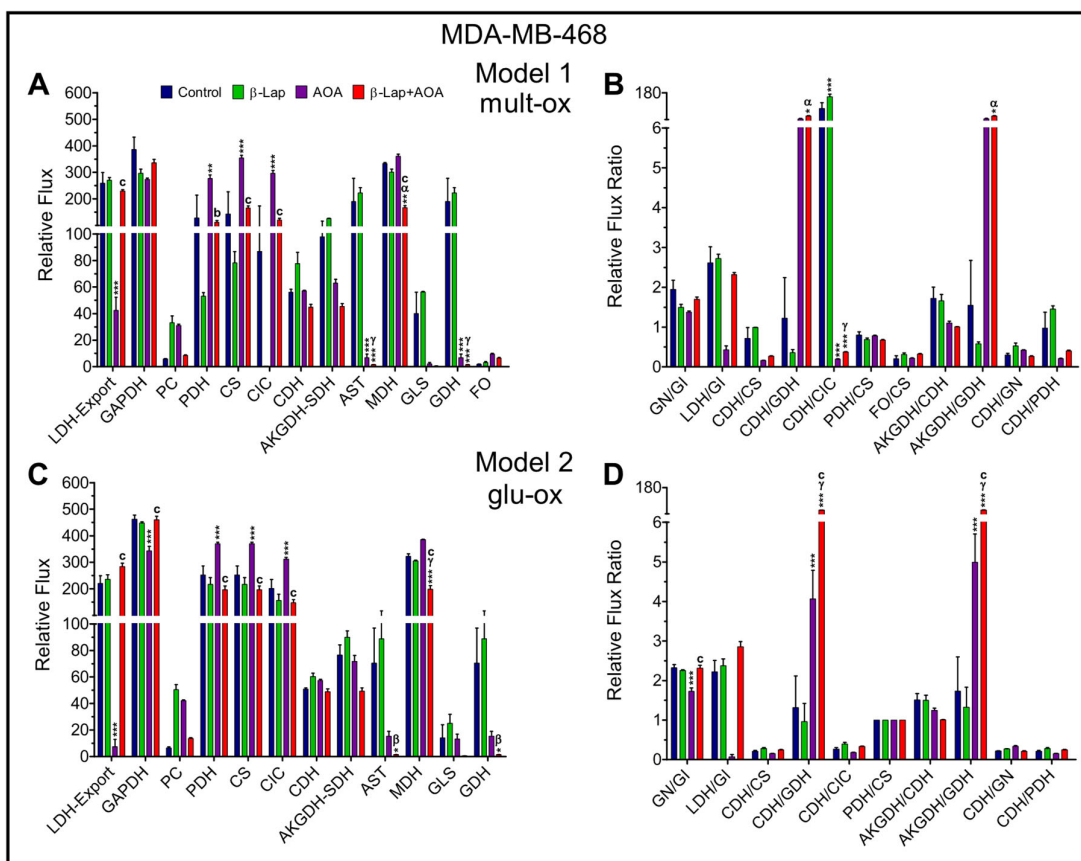

**Figure S10.** Flux model analysis in MDA-MB-468. Model 1 is represented in relative fluxes and relative flux ratios in panels (A,B), and Model 2 is represented in panels (C,D). Abbreviation of metabolic reactions: lactate dehydrogenase (LDH), lactate export (Export), glyceraldehyde-3-phosphate dehydrogenase (GAPDH), pyruvate carboxylase (PC), pyruvate dehydrogenase (PDH), citrate synthase (CS), mitochondrial citrate carrier (CIC), citrate dehydrogenase (CDH),  $\alpha$ -ketoglutarate dehydrogenase (AKGDH), succinate dehydrogenase (SDH), aspartate aminotransferase (AST), malate dehydrogenase (MDH), glutaminase (GLS), glutamate dehydrogenase (GDH), and fatty acid oxidation (FO). (Note: N=3, biological replicate data is represented as mean  $\pm$  SEM. Statistical significance was determined by ANOVA and student's t-test post hoc analysis and is presented as: (\*) if  $p \leq 0.05$ , (\*\*) if  $p \leq 0.01$ , and (\*\*\*) if  $p \leq 0.001$  compared to control. ( $\alpha$ ) if  $p \leq 0.05$ , ( $\beta$ ) if  $p \leq 0.01$ , and ( $\gamma$ ) if  $p \leq 0.001$  compared to  $\beta$ -lap treatment. (b) if  $p \leq 0.01$  and (c) if  $p \leq 0.001$  compared to AOA treatment.).

**Table S1.** Synergistic effects in T47D and MDA-MB-468 breast cancer cells determined by CDI values.

| Cell Line  | Metabolite | Isotopologue Fractional Enrichment (T/C) |                 |                   | CDI             | Effect   |
|------------|------------|------------------------------------------|-----------------|-------------------|-----------------|----------|
|            |            | $\beta$ -Lap                             | AOA             | AOA+ $\beta$ -Lap |                 |          |
| T47D       | Citrate    | $0.97 \pm 0.02$                          | $0.95 \pm 0.01$ | $0.93 \pm 0.01$   | $1.02 \pm 0.04$ | Decrease |
|            | Glutamate  | $1.07 \pm 0.00$                          | $1.05 \pm 0.01$ | $1.29 \pm 0.00$   | $1.15 \pm 0.04$ | Increase |
|            | Succinate  | $1.27 \pm 0.01$                          | $1.06 \pm 0.00$ | $1.15 \pm 0.01$   | $0.86 \pm 0.03$ | Increase |
| MDA-MB-468 | Citrate    | $1.02 \pm 0.00$                          | $1.03 \pm 0.00$ | $0.95 \pm 0.00$   | $0.91 \pm 0.00$ | Decrease |
|            | Glutamate  | $1.11 \pm 0.01$                          | $1.21 \pm 0.01$ | $1.30 \pm 0.01$   | $0.96 \pm 0.05$ | Increase |
|            | Succinate  | $1.16 \pm 0.01$                          | $1.19 \pm 0.00$ | $1.23 \pm 0.00$   | $0.89 \pm 0.00$ | Increase |

Coefficient of drug interaction (CDI) values assessing AOA and  $\beta$ -lap synergy in the downregulation of the TCA cycle in T47D and MDA-MB-468 cells. (Note: citrate, glutamate, and succinate m+2 isotopologue data are represented as fractional enrichment (T/C)  $\pm$  SEM).  $\beta$ -lap,  $\beta$ -lapachone; AOA, aminooxyacetic acid; TCA, tricarboxylic acid; SEM, standard error of the mean; T/C, treatment/control.

**Table S2.** Metabolic flux model reactions.

| Reaction                                | Equation                                                              |
|-----------------------------------------|-----------------------------------------------------------------------|
| (v1) Glucose Import                     | Glucose.media -> Glucose.cell                                         |
| (v2) Unlabeled Glucose Contribution     | Glucose -> Glucose.cell                                               |
| (v3) Glycolysis Net                     | Glucose.cell <=> PEP + PEP                                            |
| (v4) Pyruvate Kinase                    | PEP -> Pyruvate                                                       |
| (v5) Alanine Media                      | Alanine.media -> Alanine                                              |
| (v6) Alanine Amino Transferase Net      | Pyruvate <=> Alanine                                                  |
| (v7) Lactate Dehydrogenase Net          | Pyruvate + 0.5 × O <sub>2</sub> <=> Lactate                           |
| (v8) Lactate Export                     | Lactate -> Lactate.media                                              |
| (v9) Pyruvate Dehydrogenase             | Pyruvate + 0.5 × O <sub>2</sub> -> AcCoA + CO <sub>2</sub>            |
| (v10) Pyruvate Carboxylase              | Pyruvate + CO <sub>2</sub> -> OAA                                     |
| (v11) Citrate Synthase                  | AcCoA + OAA -> Citrate                                                |
| (v12) Mitochondrial Citrate Carrier     | Citrate + Malate.cell -> Citrate.cell + Malate                        |
| (v13) Citrate Dehydrogenase             | Citrate + 0.5 × O <sub>2</sub> -> a_ketoglutarate + CO <sub>2</sub>   |
| (v14) Alpha-Ketoglutarate Dehydrogenase | a_ketoglutarate + 0.5 × O <sub>2</sub> -> Succinate + CO <sub>2</sub> |
| (v15) Succinate Dehydrogenase           | Succinate + 0.5 × O <sub>2</sub> <=> Fumarate                         |
| (v16) Fumarase                          | Fumarate <=> Malate                                                   |
| (v17) Malate Dehydrogenase              | Malate + 0.5 × O <sub>2</sub> <=> OAA                                 |
| (v18) Aspartate Aminotransferase        | OAA <=> Aspartate.mito                                                |
| (v19) Glutamate-Aspartate Antiporter    | Aspartate.mito + Glutamate -> Aspartate + Glutamate.mito              |
| (v20) Aspartate Export                  | Aspartate -> Aspartate.out                                            |
| (v21) Aspartate Aminotransferase        | Aspartate -> OAA.cell                                                 |
| (v22) Phosphoenolpyruvate Carboxykinase | OAA -> PEP + CO <sub>2</sub>                                          |
| (v23) Malate Dehydrogenase              | OAA.cell -> Malate.cell                                               |
| (v24) Malate Media Import               | Malate.media -> Malate.cell                                           |
| (v25) Malate Mitochondrial Import       | Malate.cell + a_ketoglutarate -> Malate + a_ketoglutarate.cell        |
| (v26) Glutamate Dehydrogenase           | Glutamate.mito <=> a_ketoglutarate                                    |
| (v27) Alpha-Ketoglutarate Export        | a_ketoglutarate.cell -> a_ketoglutarate.out                           |
| (v28) Glutamate Dehydrogenase           | a_ketoglutarate.cell -> Glutamate                                     |
| (v29) Glutaminase Net                   | Glutamate <=> Glutamine                                               |
| (v30) Asparagine Synthetase             | Aspartate + Glutamine -> Asparagine + Glutamate                       |
| (v31) Glutamine Import                  | Glutamine.media -> Glutamine                                          |
| (v32) Fatty Acid Import                 | Palmitoylcarnitine.media -> Palmitoylcarnitine                        |
| (v33) Fatty Acid Oxidation              | Palmitoylcarnitine + 7 × O <sub>2</sub> -> 8 × AcCoA                  |
| CO <sub>2</sub> _in                     | CO <sub>2</sub> .in -> CO <sub>2</sub>                                |
| CO <sub>2</sub> _out                    | CO <sub>2</sub> -> CO <sub>2</sub> .out                               |
| O <sub>2</sub> _in                      | O <sub>2</sub> .in -> O <sub>2</sub>                                  |
| O <sub>2</sub> _out                     | O <sub>2</sub> -> O <sub>2</sub> .out                                 |

CO<sub>2</sub>, carbon dioxide; O<sub>2</sub>, oxygen; PEP, phosphoenolpyruvate; AcCoA, acetyl-coenzyme A; OAA, oxaloacetic acid.
